# Supplementary material for: Posttraumatic Growth in Psychosis
Source: PubMed Central journal article supplement (PMC5165025; doi:10.3389/fpsyt.2016.00202), 2016-12-19
Supplement: table_1.pdf [file table_1.pdf]

Table 1

*Participants' Demographics and Clinical Characteristics (N=121)*

| <u>Variable</u>                                            | n   | %    |
|------------------------------------------------------------|-----|------|
| Gender                                                     |     |      |
| Male                                                       | 56  | 46.3 |
| Female                                                     | 65  | 53.7 |
| Diagnosis                                                  |     |      |
| Schizophrenia & Schizoaffective                            | 95  | 78.5 |
| Bi-polar with past psychotic symptoms                      | 9   | 7.4  |
| Personality or affective disorders with psychotic symptoms | 17  | 14.1 |
| Family status                                              |     |      |
| Single                                                     | 70  | 57.9 |
| Divorced/separated/widowed                                 | 32  | 26.5 |
| Married/living in couple relationship                      | 19  | 15.6 |
| Children                                                   |     |      |
| No children                                                | 82  | 67.8 |
| With children                                              | 39  | 32.2 |
| Housing status                                             |     |      |
| Lives independently                                        | 24  | 19.8 |
| Lives with family                                          | 37  | 30.6 |
| Rehabilitation housing services in the community           | 60  | 49.6 |
| Employment status                                          |     |      |
| Not working                                                | 33  | 27.3 |
| Working in community rehabilitation factories              | 88  | 72.7 |
| Psychiatric hospitalization                                |     |      |
| Were psychiatrically hospitalized                          | 119 | 98.3 |
| No hospitalization                                         | 2   | 1.7  |
| Time since last psychiatric hospitalization                |     |      |
| Less than a year                                           | 15  | 12.4 |
| A year to five years                                       | 48  | 39.7 |
| More than 5 years                                          | 28  | 23.1 |
| More than 10 years                                         | 24  | 19.8 |
| Did not answer                                             | 6   | 5.0  |
| Traumatic history (including multiple experiences)         |     |      |
| Experienced more than five high magnitude stressors        | 106 | 87.5 |
| Experienced sexual abuse as a child                        | 31  | 25.6 |
| Experienced violence as a child                            | 47  | 39.7 |
| Experienced a sudden death/loss of a loved one             | 81  | 66.9 |
