# Supplementary material for: Posttraumatic Growth in Psychosis
Source: PubMed Central journal article supplement (PMC5165025; doi:10.3389/fpsyt.2016.00202), 2016-12-19
Supplement: table_2.pdf [file table_2.pdf]

## Posttraumatic growth in psychosis

Table 2

*Means, standard deviations and correlations of the research variables, subscale scores  
(N=121)*

| Variable,<br>M (SD)                                       | PTGI-<br>relation<br>with<br>others | PTGI-<br>new<br>possibi-<br>lities | PTGI-<br>personal<br>strength | PTGI-<br>spiritual<br>change | PTGI-<br>appreciat<br>ion of<br>life | PANSS<br>total | PANSS<br>positive<br>symptom<br>s | PANSS<br>negative<br>symptom<br>s | PANSS<br>general<br>psycho-<br>patholog<br>y | Meaning<br>total<br>(MLQ) | Coping<br>self-<br>efficacy<br>(CSE)<br>total |
|-----------------------------------------------------------|-------------------------------------|------------------------------------|-------------------------------|------------------------------|--------------------------------------|----------------|-----------------------------------|-----------------------------------|----------------------------------------------|---------------------------|-----------------------------------------------|
| PTGI-total score<br>61.16 (21.87)                         | .89***                              | .86***                             | .81***                        | .62***                       | .78***                               | -.38***        | -.20*                             | -.38***                           | -.36***                                      | .68***                    | .66***                                        |
| PTGI-relation with<br>others 19.91 (7.98)                 |                                     | .67***                             | .64***                        | .49***                       | .61***                               | -.41***        | -.26**                            | -.42***                           | -.34***                                      | .58***                    | .56***                                        |
| PTGI- new<br>Possibilities 14.99<br>(6.42)                |                                     |                                    | .60***                        | .48***                       | .61***                               | -.31***        | -.15                              | -.33***                           | -.28**                                       | .61***                    | .62***                                        |
| PTGI- personal<br>strength 12.45<br>(4.58)                |                                     |                                    |                               | .40***                       | .65***                               | -.28**         | -.16                              | -.20*                             | -.31***                                      | .47***                    | .54***                                        |
| PTGI-spiritual<br>change 4.86 (3.41)                      |                                     |                                    |                               |                              | .30***                               | -.21*          | -.05                              | -.24**                            | -.20*                                        | .50***                    | .35**                                         |
| PTGI-appreciation<br>of life 8.96 (4.31)                  |                                     |                                    |                               |                              |                                      | -.28**         | -.12                              | -.25**                            | -.29***                                      | .55***                    | .54***                                        |
| PANSS total 84.20<br>(19.33)                              |                                     |                                    |                               |                              |                                      |                | .76***                            | .86***                            | .91***                                       | -.39***                   | -.40***                                       |
| PANSS positive<br>symptoms 18.79<br>(5.08)                |                                     |                                    |                               |                              |                                      |                |                                   | .53***                            | .57***                                       | -.16                      | -.21*                                         |
| PANSS negative<br>symptoms 23.73<br>(7.61)                |                                     |                                    |                               |                              |                                      |                |                                   |                                   | .65***                                       | -.34***                   | -.31***                                       |
| PANSS General<br>psychopathology<br>41.68 (9.76)          |                                     |                                    |                               |                              |                                      |                |                                   |                                   |                                              | -.43***                   | -.45***                                       |
| Meaning total<br>(MLQ) 45.54<br>(14.57)                   |                                     |                                    |                               |                              |                                      |                |                                   |                                   |                                              |                           | .74***                                        |
| Coping self-<br>efficacy (CSE)<br>total 139.80<br>(50.64) |                                     |                                    |                               |                              |                                      |                |                                   |                                   |                                              |                           |                                               |

Note. PTGI: Posttraumatic Growth Inventory; PANSS: Positive and Negative Syndrome Scale

\*p<.05, \*\*p<.01, \*\*\*p<.001
