# Supplementary material for: Posttraumatic Growth in Psychosis
Source: PubMed Central journal article supplement (PMC5165025; doi:10.3389/fpsyt.2016.00202), 2016-12-19
Supplement: table_3.pdf [file table_3.pdf]

## Posttraumatic growth in psychosis

Table 3

*Mediation analyses for MLQ total, PANSS total, and PTGI (total and its five dimensions) scores (N=121)*

| <u>Dependent Variable (DV)</u> | <u>Independent variable (IV)</u> | <u>Mediator</u> | <u>IV to mediator</u><br>B (SE) | <u>Mediator to DV</u><br>B (SE) | <u>Mediation effect</u><br>B (SE) | <u>Z</u> |
|--------------------------------|----------------------------------|-----------------|---------------------------------|---------------------------------|-----------------------------------|----------|
| PTGI total                     | PANSS total                      | MLQ total       | -0.29***<br>(0.06)              | 0.93***<br>(0.11)               | -0.27<br>(0.07)                   | 4.02***  |
| PTGI                           |                                  |                 |                                 | 0.09**<br>(0.03)                | -0.08<br>(0.02)                   | 3.60***  |
| Relations with others total    |                                  |                 |                                 | 0.25***<br>(0.03)               | -0.07<br>(0.02)                   | 3.97***  |
| PTGI                           |                                  |                 |                                 | 0.14***<br>(0.03)               | -0.04<br>(0.02)                   | 3.07**   |
| New possibilities total        |                                  |                 |                                 | 0.12***<br>(0.03)               | -0.03<br>(0.01)                   | 3.89***  |
| PTGI                           |                                  |                 |                                 | 0.15***<br>(0.02)               | -0.05<br>(0.01)                   | 3.40***  |
| Personal strength total        |                                  |                 |                                 |                                 |                                   |          |
| PTGI                           |                                  |                 |                                 |                                 |                                   |          |
| Spiritual change total         |                                  |                 |                                 |                                 |                                   |          |
| PTGI                           |                                  |                 |                                 |                                 |                                   |          |
| Appreciation of life total     |                                  |                 |                                 |                                 |                                   |          |

*Note.* \*\*p<.01, \*\*\*p<.001
