# Supplementary material for: Posttraumatic Growth in Psychosis
Source: PubMed Central journal article supplement (PMC5165025; doi:10.3389/fpsyt.2016.00202), 2016-12-19
Supplement: table_4.pdf [file table_4.pdf]

## Posttraumatic growth in psychosis

Table 4

*Mediation analyses for PANSS total, CSE total, and PTGI (total and its five dimensions) scores (N=121)*

| Dependent Variable (DV)     | Independent variable (IV) | Mediator  | IV to mediator<br>B (SE) | Mediator to DV<br>B (SE) | Mediation effect<br>B (SE) | Z       |
|-----------------------------|---------------------------|-----------|--------------------------|--------------------------|----------------------------|---------|
| PTGI total                  | PANSS total               | CSE total | -1.05***<br>(0.22)       | 0.26***<br>(0.03)        | -0.27<br>(0.08)            | 3.53*** |
| PTGI                        |                           |           |                          | .07***<br>(.01)          | -0.08<br>(0.02)            | 3.33*** |
| Relations with others total |                           |           |                          | .07***<br>(.01)          | -0.08<br>(0.02)            | 3.85*** |
| PTGI                        |                           |           |                          | .05***<br>(.01)          | -0.05<br>(0.02)            | 2.93**  |
| New possibilities total     |                           |           |                          | .02**<br>(.01)           | -0.02<br>(0.01)            | 2.88**  |
| PTGI                        |                           |           |                          | .04***<br>(.01)          | -0.05<br>(0.02)            | 2.83**  |
| Personal strength total     |                           |           |                          |                          |                            |         |
| PTGI                        |                           |           |                          |                          |                            |         |
| Spiritual change total      |                           |           |                          |                          |                            |         |
| PTGI                        |                           |           |                          |                          |                            |         |
| Appreciation of life total  |                           |           |                          |                          |                            |         |

*Note.* \*\*p<.01, \*\*\*p<.001
