# Supplementary material for: Posttraumatic Growth in Psychosis
Source: PubMed Central journal article supplement (PMC5165025; doi:10.3389/fpsyt.2016.00202), 2016-12-19
Supplement: table_5.pdf [file table_5.pdf]

Posttraumatic growth in psychosis

Table 5

*Mediation analyses for the dimensions of PANSS, MLO total, CSE total, and PTGI total (N=121)*

| Dependent Variable (DV) | Independent variable (IV)              | Mediator  | IV to mediator<br>B (SE) | Mediator to DV<br>B (SE) | Mediation effect<br>B (SE) | Z       |
|-------------------------|----------------------------------------|-----------|--------------------------|--------------------------|----------------------------|---------|
| PTGI total              | PANSS<br>Positive symptoms total       | MLQ total | -0.46<br>(0.26)          | 0.99***<br>(0.10)        | -0.46<br>(0.27)            | 1.71    |
|                         |                                        | CSE total | -2.08<br>(0.89)          | 0.28***<br>(0.03)        | -0.58<br>(0.28)            | 2.09    |
|                         | PANSS<br>Negative symptoms total       | MLQ total | -0.64***<br>(.17)        | 0.93***<br>(0.11)        | -0.60<br>(0.17)            | 3.62*** |
|                         |                                        | CSE total | -2.06***<br>(0.58)       | 0.26***<br>(0.03)        | -0.53<br>(0.17)            | 3.13**  |
|                         | PANSS<br>General psychopathology total | MLQ total | -0.64***<br>(.12)        | 0.96***<br>(0.11)        | -0.61<br>(0.13)            | 4.77*** |
|                         |                                        | CSE total | -2.32***<br>(0.43)       | 0.27***<br>(0.03)        | -0.62<br>(0.15)            | 4.08*** |

Note. \*\*p<.01, \*\*\*p<.001
